# Supplementary material for: Resurgence risk for malaria, and the characterization of a recent outbreak in an Amazonian border area between French Guiana and Brazil
Source: Springer Nature journal article supplement (doi:10.1186/s12879-020-05086-4), 2020-05-26
Supplement: MOESM2 [file 18015938]

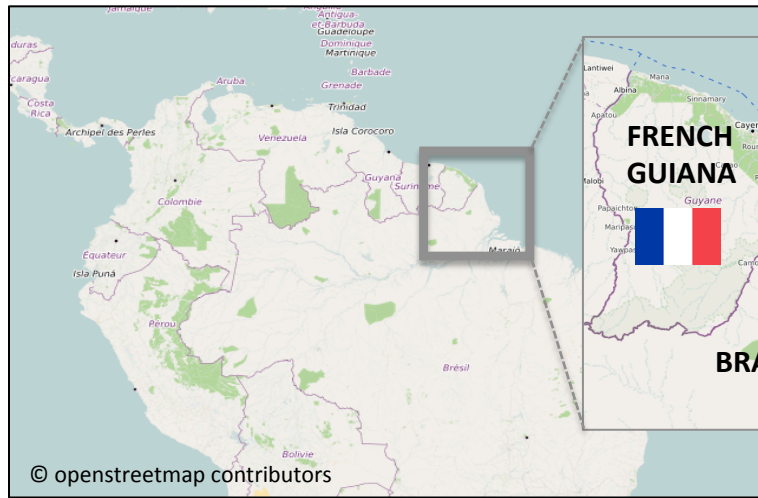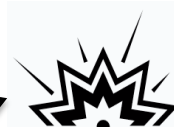

May 2017: Malaria outbreak due to *Plasmodium vivax* at the border between French Guiana and Brazil

Investigation

### Seasonality and comparison of the border area between French Guiana and Brazil

- Seasonal variation
- Peak in novembre 2017
- Same profil on both side of the border

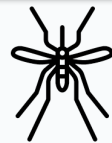

### Entomological findings

- *Anopheles darlingi*
- Peak in August
- Positive in PCR for *Plasmodium vivax*

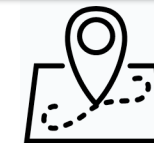

### Epidemic profile analysis

- 4 different clusters
- Onset of the epidemic in Native Indians brazilians villages

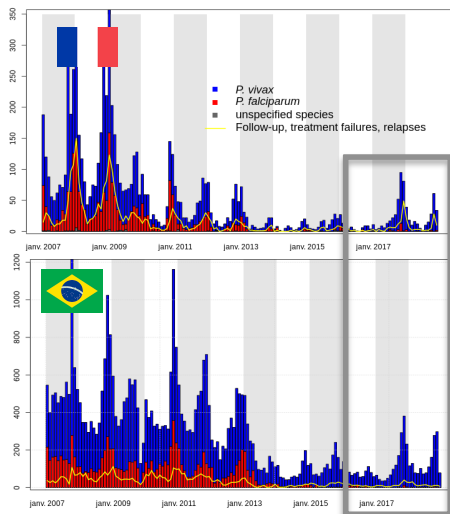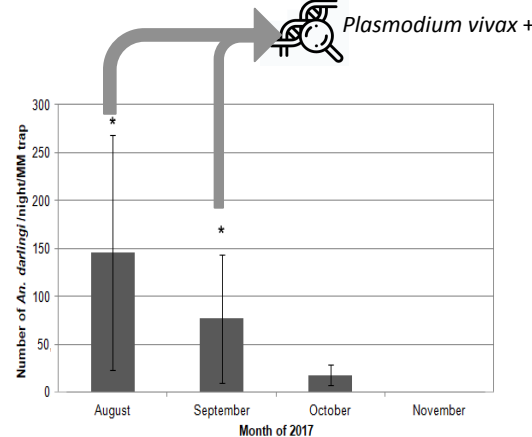

Normalized cumulative case number (%)

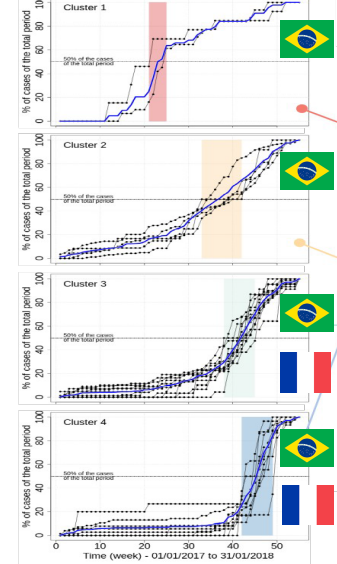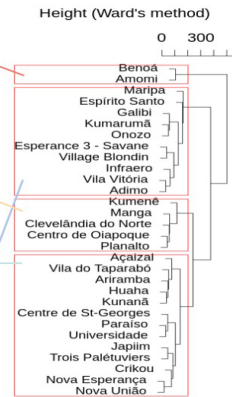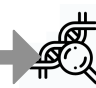

*Plasmodium vivax* +
